## Withdrawal Statement File

### Deep Learning Solutions for Pneumonia Detection: Performance

#### Comparison of Custom and Transfer Learning Models

Yihao Zhong<sup>1</sup>, Yanan Liu<sup>2</sup>, Erdi Gao<sup>3</sup>, Changsong Wei<sup>4</sup>, Zhuoyue Wang<sup>5</sup> and Chao Yan\*

<sup>1</sup> Courant Institute of Mathematical Sciences, New York University, New York, USA

<sup>2</sup> Research and Development Department, Suzhou Liangchuang Hongzhi Intelligent Technology Co. Ltd.,  
Kunshan, China

<sup>3</sup> Tandon School of Engineering, New York University, New York, USA

<sup>4</sup> Digital Financial Information Technology Co.LTD, Chengdu, China

<sup>5</sup> Department of Electrical Engineering and Computer Sciences, University of California, Berkeley, CA

\* Department of Electrical and Computer Engineering, Northeastern University  
Sunnyvale, USA

[ycmike97@gmail.com](mailto:ycmike97@gmail.com)

The authors have withdrawn this manuscript because of the following reasons:

**Significant Methodological Errors:** Upon further review of our work, we discovered critical methodological errors in the data preprocessing stage that affect the reliability and reproducibility of the results. These errors could mislead other researchers if left unaddressed.

**Inaccurate Data Interpretation:** In addition, we have found that some of the interpretations of the results, especially concerning model performance, were not adequately supported by the data. This misinterpretation has led to conclusions that do not align with our current understanding of the study.

**Ethical Considerations:** After further reflection, we have recognized the need to clarify certain ethical aspects of our data collection process, especially regarding the dataset used. This issue needs to be addressed in compliance with ethical guidelines before the findings can be deemed credible and citable.

**NOTE:** This preprint reports new research that has not been certified by peer review and should not be used to guide clinical practice.

New Research Developments: Finally, new developments in related research have emerged, which contradict some of the conclusions presented in our manuscript. As we plan to pursue a different direction that incorporates these new findings, we feel that it is necessary to retract the current manuscript.

After careful reconsideration, my co-authors and I have identified several issues that we believe warrant the withdrawal of the manuscript. Therefore, the authors do not wish this work to be cited as reference for the project. If you have any questions, please contact the corresponding author.
